# Supplementary material for: Photochromic oligothienoacene derivatives with photo-switchable luminescene properties and computational studies
Source: Royal Society of Chemistry journal article supplement (doi:10.1039/b810585e), 2008-01-01
Supplement: b810585e.pdf [file b810585e.pdf]

**Photochromic Oligothienoacene Derivatives with Photo-Switchable Luminescence  
Properties and Computational Studies**

Chi-Chiu Ko, Wai Han Lam and Vivian Wing-Wah Yam\*

Department of Chemistry, and HKU-CAS Joint Laboratory on New Materials, The  
University of Hong Kong, Pokfulam Road, Hong Kong, PR China.

**Supplementary Information**

### General Experimental Procedures for 1 – 3

The tetrabromodithieno[3,2-b:2',3'-d]thiophene, 2,3,5-tribromo- and tetrabromothieno[3,2-b]thiophene, and were prepared according to the procedure reported by Iddon and coworkers<sup>1</sup> as well as Frey, Holmes and coworkers.<sup>2</sup> All reactions were performed under strictly anaerobic conditions in an inert atmosphere of nitrogen using standard Schlenk technique.

**2,5-Dimethylthien-3-ylboronic acid.**<sup>3</sup> To a stirred solution of anhydrous 3-bromo-2,5-dimethylthiophene (2.7 g, 14.1 mmol) in anhydrous THF (40 ml) at  $-78^{\circ}\text{C}$  was slowly added *n*-butyllithium (1.6 M in hexane, 9.7 ml, 15.6 mmol) and the reaction mixture was then stirred at this temperature for 90 minutes. A solution of tri-*n*-butyl borate (3.85 ml, 14.2 mmol) in THF (10 ml) was then added over a period of 15 min. After stirring for 5 hours, aqueous HCl (2 M) solution was added and the mixture was stirred at room temperature for 10 hours. This was followed by extraction with diethyl ether and the combined extracts were then washed with copious amounts of water. The product was then obtained by extracting the ethereal layer with aqueous sodium hydroxide solution (2 M, 20 ml), followed by acidification with HCl (12 M) to commence the precipitation of 2,5-dimethylthien-3-yl boronic acid as an analytically pure white powder. Yield: 1.9 g, 7.8 mmol; 87 %. <sup>1</sup>H NMR (300 MHz, d<sup>6</sup>-DMSO, 298 K):  $\delta$  2.33 (s, 3H, 5-Me), 2.50 (s, 3H, 2-Me), 6.85 (s, 1H, thienyl proton at 4-position), 7.72 (br, s, 2H, -B(OH)<sub>2</sub>).

**Diarylethene-containing thieno[3,2-b]thiophenes and dithieno[3,2-b:2',3'-d]thiophene (1 – 3).** The target compounds were synthesized by the bis-coupling reaction of 2,5-dimethylthien-3-yl boronic acid with the corresponding the bromo-derivatives of thieno[3,2-b]thiophene and dithieno[3,2-b:2',3'-d]thiophene according to standard Suzuki coupling procedure in a heterogeneous mixture of water and 1,4-dioxane.

To the solution of bromo- derivatives of thieno[3,2-b]thiophene and dithieno[3,2-b:2',3'-d]thiophene, 2,5-dimethylthien-3-yl boronic acid (4 – 6 mol equiv.), tetrakis(triphenylphosphine)palladium(0) (0.1 mol equiv.) in 1,4-dioxane was added aqueous sodium carbonate solution (2 M, 8 mol equiv.). The resulting heterogeneous mixture was vigorously stirred and heated under reflux and the course of reaction monitored by TLC. It was then extracted with dichloromethane, and the combined extracts were dried over anhydrous magnesium sulfate. After filtration and removal of the solvent under reduced pressure, the residue was purified by column chromatography on silica gel (70–230 mesh) with *n*-hexane-chloroform (1:1 v/v) as eluent. Further purification was achieved by slowly diffusion of diethyl ether vapor into a concentrated chloroform solution to give the target compounds as white to pale yellow crystalline solid.

#### **Experimental Details for Luminescence Quantum Yield Determinations**

The quantum yields of luminescence were determined according to the method described by Crosby *et al.*<sup>4</sup> utilizing quinine sulfate in aqueous sulfuric acid (0.5 M) as reference standard.

## Computational Details

Calculations were carried out using Gaussian03 software package.<sup>5</sup> Density functional theory (DFT) at the hybrid Perdew, Burke, and Ernzerhof functional (PBE1PBE)<sup>6</sup> level of theory with a larger grid size (99590) was used to optimize the ground-state geometries of the open forms **1–3** and closed forms **1'–3'**. Based on the ground state optimized geometries in the gas phase, non-equilibrium time-dependent (TDDFT) method<sup>7</sup> at the same level associated with conductor-like polarizable continuum model (CPCM)<sup>8</sup> using benzene as a solvent (ofac = 0.8 and rmin = 0.5) was employed to study the nature of the singlet-singlet transitions in the electronic absorption spectra of the open forms **1–3** and closed forms **1'–3'**. The first singlet excited state ( $S_1$ ) of the open forms **1–3** was optimized using the configuration interaction singles (CIS) method.<sup>9</sup> Since CIS method is the Hartree-Fock (HF) analogue for the excited state, the open forms were also optimized at the HF level of theory in order to compare the ground-state and excited-state structures of the open forms. On the basis of the  $S_1$  optimized geometries, the emission energies of the open forms **1–3** were computed at the TD-PBE1PBE/CPCM calculation (benzene as the solvent). Except for the geometry optimizations of the ground and first singlet excited states of the open forms **2** and **3**, in which they were performed with the constraint of  $C_2$  symmetry, all the geometry optimizations were performed with no symmetry restriction. For all the calculations, the 6-31Gd(p) basis set<sup>10</sup> was employed to describe the S, C and H atoms. Vibrational frequencies were calculated for all stationary points to verify that each was a minimum (NIMAG = 0) on the potential energy surface.

## PBE1PBE Ground-State Geometries

The PBE1PBE optimized ground-state structures of the open forms **1–3** and closed forms **1'–3'** are shown in Figure S1. For the open forms, the oligothienoacene core is essentially planar in the calculated structures of **1–3**, with the interplanar angles between the core and the peripheral thiophene rings in the ranges of 35.5–51.2, 48.8–51.3, and 49.2–51.4° for **1**, **2** and **3**, respectively. The average C=C and C–C bond distances are 1.382 and 1.423 Å for **1**, 1.384 and 1.429 Å for **2**, 1.386 and 1.424 Å for **3**, respectively, in the oligothienoacene core as well as 1.370 and 1.435 Å for **1**, 1.370 and 1.436 Å for **2**, 1.370 and 1.436 Å for **3** in the peripheral thiophene rings. Different from the symmetric S–C bond distances found in the peripheral thiophene rings [**1** (1.731–1.735 Å), **2** (1.732–1.735 Å) and **3** (1.732–1.735 Å)], the calculated C–S bond distances in the oligothienoacene core are rather unsymmetric, in which the average exterior C–S bond distances [**1** (1.756 Å), **2** (1.755 Å) and **3** (1.756 Å)] are slightly longer than the average interior S–C bonds [**1** (1.729 Å), **2** (1.728 Å) and **3** (1.735 Å)]. The distance between the two reacting carbon atoms is 3.576, 3.578 and 3.580 Å for **1**, **2** and **3**, respectively. This distance is decreased to 1.534 Å for the *trans* configuration of the closed forms **1'–3'**. In addition, the bond lengths of inner C–S bonds (1.853–1.854 Å) are longer than outer C–S bonds (1.758–1.762 Å) in the condensed ring for **1'–3'**. The difference between the C–S bond lengths is due to the hybridization of the carbon atoms.

## References

- 1 L. S. Fuller, B. Iddon MP and K. A. Smith, *J. Chem. Soc., Perkin Trans. 1*, 1999, 1273.
- 2 J. Frey, A. D. Bond and A. B. Holmes, *Chem. Commun.*, 2002, 2424.
- 3 C. C. Ko, W. M. Kwok, V. W. W. Yam, D. L. Phillips, *Chem. Eur. J.*, 2006, **12**, 5840.
- 4 J. N. Demas and G. A. Crosby, *J. Phys. Chem.*, 1971, **75**, 991.
- 5 M. J. Frisch, G. W. Trucks, H. B. Schlegel, G. E. Scuseria, M. A. Robb, J. R. Cheeseman, J. A. Montgomery, Jr., T. Vreven, K. N. Kudin, J. C. Burant, J. M. Millam, S. S. Iyengar, J. Tomasi, V. Barone, B. Mennucci, M. Cossi, G. Scalmani, N. Rega, G. A. Petersson, H. Nakatsuji, M. Hada, M. Ehara, K. Toyota, R. Fukuda, J. Hasegawa, M. Ishida, T. Nakajima, Y. Honda, O. Kitao, H. Nakai, M. Klene, X. Li, J. E. Knox, H. P. Hratchian, J. B. Cross, V. Bakken, C. Adamo, J. Jaramillo, R. Gomperts, R. E. Stratmann, O. Yazyev, A. J. Austin, R. Cammi, C. Pomelli, J. W. Ochterski, P. Y. Ayala, K. Morokuma, G. A. Voth, P. Salvador, J. J. Dannenberg, V. G. Zakrzewski, S. Dapprich, A. D. Daniels, M. C. Strain, O. Farkas, D. K. Malick, A. D. Rabuck, K. Raghavachari, J. B. Foresman, J. V. Ortiz, Q. Cui, A. G. Baboul, S. Clifford, J. Cioslowski, B. B. Stefanov, G. Liu, A. Liashenko, P. Piskorz, I. Komaromi, R. L. Martin, D. J. Fox, T. Keith, M. A. Al-Laham, C. Y. Peng, A. Nanayakkara, M. Challacombe, P. M. W. Gill, B. Johnson, W. Chen, M. W. Wong, C. Gonzalez and J. A. Pople, *GAUSSIAN 03 (Revision C.02)*, Gaussian, Inc., Wallingford, CT, 2004.
- 6 (a) M. Ernzerhof and G. E. Scuseria, *J. Chem. Phys.*, 1999, **110**, 5029; (b) M. Ernzerhof, J. P. Perdew and K. Burke, *Int. J. Quantum. Chem.*, 1997, **64**, 285.

- 7 (a) R. E. Stratmann, G. E. Scuseria and M. J. Frisch, *J. Chem. Phys.*, 1998, **109**, 8218;  
(b) R. Bauernschmitt and R. Ahlrichs, *Chem. Phys. Lett.*, 1996, **256**, 454; (c) M. E. Casida, C. Jamorski, K. C. Casida and D. R. Salahub, *J. Chem. Phys.*, 1998, **108**, 4439.
- 8 (a) V. Barone and M. J. Cossi, *J. Phys. Chem. A*, 1998, **102**, 1995; (b) M. Cossi, N. Rega, G. Scalmani and V. Barone, *J. Comput. Chem.*, 2003, **24**, 669.
- 9 J. B. Foresman, M. Head-Gordon, J. A. Pople and M. J. Frisch, *J. Phys. Chem.*, 1992, **96**, 135.
- 10 (a) W. J. Hehre, R. Ditchfield and J. A. Pople, *J. Chem. Phys.*, 1972, **56**, 2257; (b) P. C. Hariharan and J. A. Pople, *Theor. Chim. Acta*, 1973, **28**, 213; (c) M. M. Francl, W. J. Pietro, W. J. Hehre, J. S. Binkley, M. S. Gordon, D. J. Defrees and J. A. Pople, *J. Chem. Phys.*, 1982, **77**, 3654.

**Table S1.** The first singlet excited state ( $S_1$ ) computed by TD-PBE1PBE/CPCM using benzene as a solvent based on PBE1PBE ground-state optimized geometry of the open forms **1–3**, with the orbitals involved in the excitations (H = HOMO and L = LUMO), transition coefficients, vertical excitation wavelengths (nm), oscillator strengths ( $f$ ) and the  $\lambda_{\max}$  observed from the electronic absorption spectra of the open forms **1–3**

| Compound             | $S_n$ | Excitation        | Transition Coefficient | $f$   | Vertical excitation wavelength (nm) | Experimental $\lambda_{\max}$ (nm) |
|----------------------|-------|-------------------|------------------------|-------|-------------------------------------|------------------------------------|
| <b>1</b> (open form) | $S_1$ | H $\rightarrow$ L | 0.66                   | 0.881 | 336                                 | 334                                |
| <b>2</b> (open form) | $S_1$ | H $\rightarrow$ L | 0.66                   | 0.654 | 334                                 | 332                                |
| <b>3</b> (open form) | $S_1$ | H $\rightarrow$ L | 0.66                   | 0.970 | 353                                 | 350                                |



**Table S2.** The first three singlet excited states computed by TD-PBE1PBE/CPCM using benzene as a solvent based on PBE1PBE ground-state optimized geometry of the closed forms **1'**–**3'**, with the orbitals involved in the excitations (H = HOMO and L = LUMO), transition coefficients, vertical excitation wavelengths (nm), oscillator strengths ( $f$ ) and  $\lambda_{\max}$  observed from the UV electronic absorption spectra of the closed forms **1'**–**3'**

| Compound                | S <sub>n</sub> | Excitation <sup>a</sup> | Transition Coefficient | $f$   | Vertical excitation wavelength (nm) | Experimental $\lambda_{\max}$ (nm) |
|-------------------------|----------------|-------------------------|------------------------|-------|-------------------------------------|------------------------------------|
| <b>1'</b> (closed form) | S <sub>1</sub> | H → L                   | 0.63                   | 0.187 | 585                                 | 560                                |
|                         |                | H-1 → L                 | 0.42                   | 0.005 | 389                                 |                                    |
|                         | S <sub>3</sub> | H → L+1                 | 0.55                   | 1.025 | 377                                 | 378                                |
|                         |                | H-1 → L                 | 0.52                   |       |                                     |                                    |
|                         |                | H → L+1                 | -0.40                  |       |                                     |                                    |
| <b>2'</b> (closed form) | S <sub>1</sub> | H → L                   | 0.63                   | 0.189 | 582                                 | 560                                |
|                         |                | H-1 → L                 | -0.46                  | 0.006 | 390                                 |                                    |
|                         | S <sub>3</sub> | H → L+1                 | 0.51                   | 0.776 | 378                                 | 370                                |
|                         |                | H-1 → L                 | 0.48                   |       |                                     |                                    |
|                         |                | H → L+1                 | 0.46                   |       |                                     |                                    |
| <b>3'</b> (closed form) | S <sub>1</sub> | H → L                   | 0.63                   | 0.224 | 589                                 | 564                                |
|                         |                | H-1 → L                 | -0.38                  | 0.008 | 402                                 |                                    |
|                         | S <sub>3</sub> | H → L+1                 | 0.57                   | 1.067 | 392                                 | 386                                |
|                         |                | H-1 → L                 | 0.54                   |       |                                     |                                    |
|                         |                | H → L+1                 | 0.37                   |       |                                     |                                    |

<sup>a</sup>The excitation with the absolute value of transition coefficients less than 0.2 were not shown.

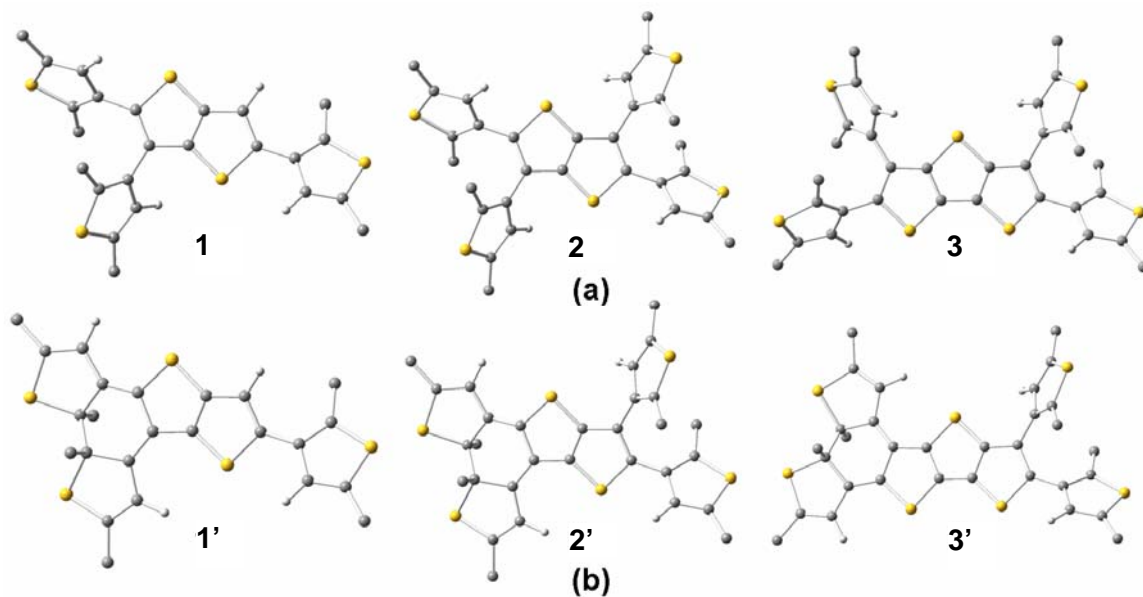

**Figure S1.** PBE1PBE optimized geometries of the (a) open forms **1–3** and (b) closed forms **1’–3’** (The open forms **2** and **3** are with  $C_2$  symmetry). Hydrogen atoms on the methyl groups are omitted for clarity.

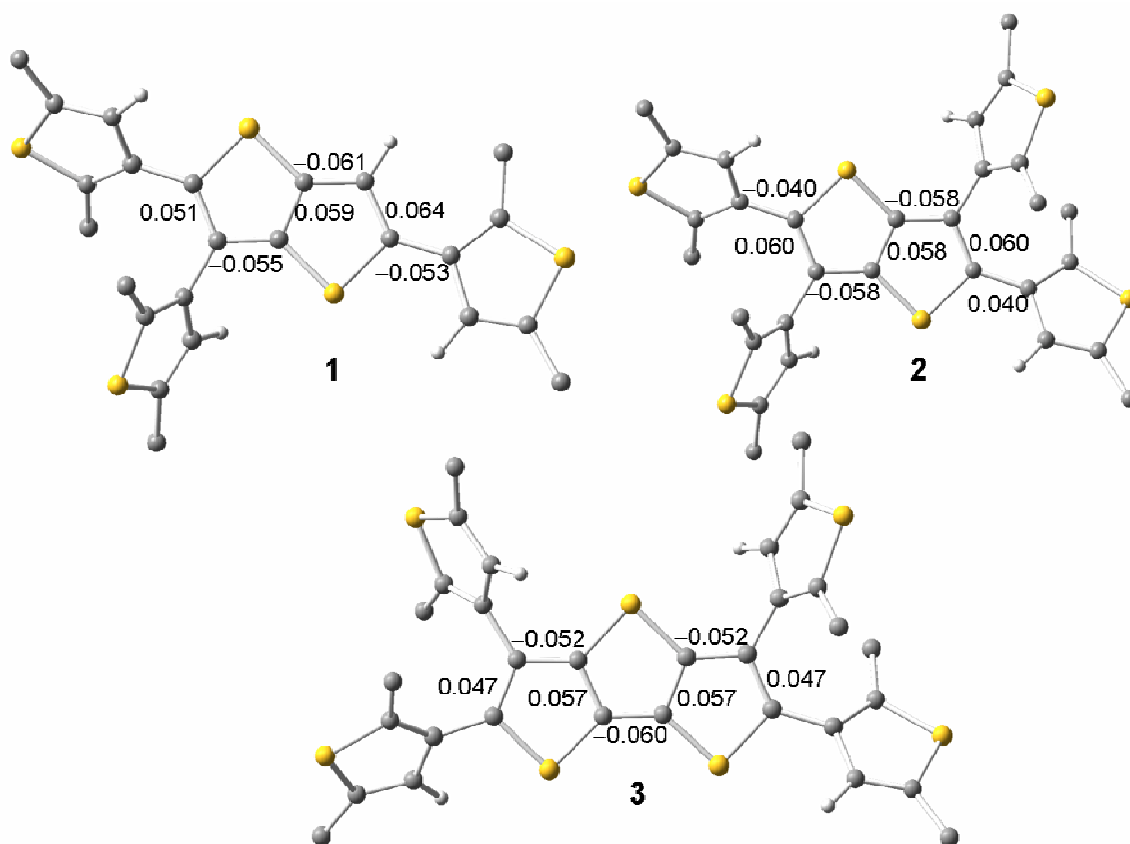

**Figure S2.** CIS optimized structures of the first singlet states of the open forms **1–3** with the change in bond distances (in Å), relative to their corresponding HF optimized ground states. Only differences in bond distances larger than or equal to 0.04 Å were shown. Hydrogen atoms on the methyl groups are omitted for clarity.

Cartesian coordinates for all optimized structures reported in the paper with the calculated electronic energy (Hartree) in parenthesis

PBE1PBE optimized geometries of the open forms **1–3**

| 1 (-2916.921319) |   |           |           |           | 2 (-3546.950082) |   |           |           |           |
|------------------|---|-----------|-----------|-----------|------------------|---|-----------|-----------|-----------|
| 1                | C | 6.389153  | 0.550456  | -0.712266 | 1                | S | 1.514130  | 1.417424  | -0.042869 |
| 2                | S | 6.904602  | -0.779675 | 0.274452  | 2                | S | -4.762301 | 2.900752  | 0.687120  |
| 3                | C | 5.283874  | -1.308080 | 0.574254  | 3                | S | -0.263717 | 6.237862  | -0.619828 |
| 4                | C | 4.382415  | -0.491036 | -0.075706 | 4                | C | -0.001536 | 2.302001  | -0.028346 |
| 5                | C | 5.029957  | 0.566486  | -0.798211 | 5                | C | -1.102188 | 1.463422  | -0.034208 |
| 6                | C | 5.028692  | -2.481158 | 1.460876  | 6                | C | -0.684295 | 0.098176  | -0.086094 |
| 7                | C | 2.934509  | -0.655283 | -0.033578 | 7                | C | -3.057839 | 2.728114  | 0.950703  |
| 8                | S | 1.908264  | 0.769335  | -0.016427 | 8                | C | -2.515951 | 1.862422  | 0.028959  |
| 9                | C | 0.479029  | -0.204035 | 0.036964  | 9                | C | -3.501018 | 1.332796  | -0.870229 |
| 10               | C | 0.804550  | -1.550886 | 0.042272  | 10               | H | -3.261503 | 0.635542  | -1.667105 |
| 11               | C | 2.196438  | -1.814613 | -0.003305 | 11               | C | -4.763589 | 1.798619  | -0.652123 |
| 12               | S | -0.627137 | -2.517961 | 0.048140  | 12               | C | -0.629412 | 4.571971  | -0.921085 |
| 13               | C | -1.652128 | -1.092733 | 0.035590  | 13               | C | 0.065249  | 3.763205  | -0.048299 |
| 14               | C | -0.920292 | 0.081579  | 0.014905  | 14               | C | 0.907508  | 4.513595  | 0.839790  |
| 15               | C | -3.099686 | -1.297006 | 0.081660  | 15               | H | 1.527764  | 4.047514  | 1.598991  |
| 16               | C | -3.954688 | -0.674867 | 0.965031  | 16               | C | 0.842353  | 5.863157  | 0.663250  |
| 17               | S | -5.583945 | -1.196598 | 0.695438  | 17               | S | -1.514130 | -1.417424 | -0.042869 |
| 18               | C | -5.129639 | -2.272020 | -0.587948 | 18               | S | 4.762301  | -2.900752 | 0.687120  |
| 19               | C | -3.783137 | -2.212073 | -0.788247 | 19               | S | 0.263717  | -6.237862 | -0.619828 |
| 20               | C | -1.455171 | 1.449853  | -0.049509 | 20               | C | 0.001536  | -2.302001 | -0.028346 |
| 21               | C | -2.384176 | 1.897836  | -0.959888 | 21               | C | 1.102188  | -1.463422 | -0.034208 |
| 22               | S | -2.717875 | 3.579224  | -0.703481 | 22               | C | 0.684295  | -0.098176 | -0.086094 |
| 23               | C | -1.600072 | 3.697759  | 0.617398  | 23               | C | 3.057839  | -2.728114 | 0.950703  |
| 24               | C | -1.009864 | 2.488207  | 0.835184  | 24               | C | 2.515951  | -1.862422 | 0.028959  |
| 25               | C | -3.058758 | 1.155230  | -2.063849 | 25               | C | 3.501018  | -1.332796 | -0.870229 |
| 26               | C | -1.387607 | 4.981418  | 1.348632  | 26               | H | 3.261503  | -0.635542 | -1.667105 |
| 27               | C | -3.643203 | 0.297099  | 2.052058  | 27               | C | 4.763589  | -1.798619 | -0.652123 |
| 28               | C | -6.142381 | -3.094532 | -1.312710 | 28               | C | 0.629412  | -4.571971 | -0.921085 |
| 29               | H | 2.640126  | -2.800968 | -0.053353 | 29               | C | -0.065249 | -3.763205 | -0.048299 |
| 30               | C | 7.371534  | 1.477395  | -1.346945 | 30               | C | -0.907508 | -4.513595 | 0.839790  |
| 31               | H | -3.187193 | 1.785535  | -2.948966 | 31               | H | -1.527764 | -4.047514 | 1.598991  |
| 32               | H | -4.045947 | 0.785897  | -1.762949 | 32               | C | -0.842353 | -5.863157 | 0.663250  |
| 33               | H | -2.458016 | 0.286235  | -2.344143 | 33               | C | 1.562380  | 6.935179  | 1.411425  |
| 34               | H | -0.280495 | 2.323564  | 1.622233  | 34               | H | 2.193953  | 7.539800  | 0.751414  |
| 35               | H | -1.025364 | 5.774083  | 0.684912  | 35               | H | 0.870422  | 7.615979  | 1.919116  |
| 36               | H | -0.642611 | 4.836858  | 2.135315  | 36               | H | 2.206403  | 6.484026  | 2.170668  |
| 37               | H | -2.308514 | 5.342161  | 1.819731  | 37               | C | -1.562380 | 4.191055  | -2.020114 |
| 38               | H | -4.287257 | 0.141266  | 2.922656  | 38               | H | -1.345930 | 3.171762  | -2.350335 |
| 39               | H | -3.765031 | 1.334255  | 1.719151  | 39               | H | -2.608181 | 4.211802  | -1.692656 |
| 40               | H | -2.603128 | 0.177101  | 2.366298  | 40               | H | -1.461417 | 4.861328  | -2.878957 |
| 41               | H | -3.274376 | -2.791314 | -1.552411 | 41               | C | -2.391935 | 3.452625  | 2.071812  |
| 42               | H | -6.673317 | -3.775375 | -0.638462 | 42               | H | -1.466956 | 2.938519  | 2.345018  |
| 43               | H | -5.646313 | -3.698714 | -2.076673 | 43               | H | -2.124923 | 4.478442  | 1.792882  |
| 44               | H | -6.893954 | -2.472979 | -1.811545 | 44               | H | -3.035277 | 3.497916  | 2.955760  |
| 45               | H | 5.038615  | -3.427715 | 0.906401  | 45               | C | -6.016146 | 1.474026  | -1.395998 |
| 46               | H | 5.783555  | -2.557255 | 2.248930  | 46               | H | -6.773755 | 1.026164  | -0.743696 |
| 47               | H | 4.047519  | -2.384036 | 1.934856  | 47               | H | -6.461894 | 2.362817  | -1.855914 |
| 48               | H | 4.487452  | 1.301800  | -1.384022 | 48               | H | -5.795178 | 0.758928  | -2.192605 |
| 49               | H | 8.041823  | 0.952830  | -2.036468 | 49               | C | -1.562380 | -6.935179 | 1.411425  |
| 50               | H | 6.838715  | 2.243963  | -1.915352 | 50               | H | -2.193953 | -7.539800 | 0.751414  |
| 51               | H | 7.995060  | 1.983630  | -0.602047 | 51               | H | -0.870422 | -7.615979 | 1.919116  |
|                  |   |           |           |           | 52               | H | -2.206403 | -6.484026 | 2.170668  |
|                  |   |           |           |           | 53               | C | 1.562380  | -4.191055 | -2.020114 |
|                  |   |           |           |           | 54               | H | 1.345930  | -3.171762 | -2.350335 |
|                  |   |           |           |           | 55               | H | 2.608181  | -4.211802 | -1.692656 |
|                  |   |           |           |           | 56               | H | 1.461417  | -4.861328 | -2.878957 |
|                  |   |           |           |           | 57               | C | 2.391935  | -3.452625 | 2.071812  |
|                  |   |           |           |           | 58               | H | 1.466956  | -2.938519 | 2.345018  |
|                  |   |           |           |           | 59               | H | 2.124923  | -4.478442 | 1.792882  |
|                  |   |           |           |           | 60               | H | 3.035277  | -3.497916 | 2.955760  |
|                  |   |           |           |           | 61               | C | 6.016146  | -1.474026 | -1.395998 |
|                  |   |           |           |           | 62               | H | 6.773755  | -1.026164 | -0.743696 |
|                  |   |           |           |           | 63               | H | 6.461894  | -2.362817 | -1.855914 |
|                  |   |           |           |           | 64               | H | 5.795178  | -0.758928 | -2.192605 |

3 (-4021.115128)

|    |   |           |           |           |
|----|---|-----------|-----------|-----------|
| 1  | C | -0.556700 | 3.929758  | 3.553495  |
| 2  | C | -0.781800 | 3.161344  | 2.449953  |
| 3  | C | 0.130887  | 3.404769  | 1.369730  |
| 4  | C | 1.068801  | 4.362392  | 1.679151  |
| 5  | S | 0.804831  | 4.969042  | 3.280953  |
| 6  | C | 0.064211  | 2.661210  | 0.102517  |
| 7  | C | 0.000000  | 1.235910  | 0.043925  |
| 8  | C | -0.001285 | 0.708393  | -1.239118 |
| 9  | S | 0.045550  | 1.964289  | -2.418616 |
| 10 | C | 0.077399  | 3.200112  | -1.172138 |
| 11 | S | 0.000000  | 0.000000  | 1.276338  |
| 12 | C | 0.000000  | -1.235910 | 0.043925  |
| 13 | C | 0.001285  | -0.708393 | -1.239118 |
| 14 | C | -0.064211 | -2.661210 | 0.102517  |
| 15 | S | -0.045550 | -1.964289 | -2.418616 |
| 16 | C | 0.078442  | 4.597426  | -1.603643 |
| 17 | C | -0.784258 | 5.565448  | -1.137394 |
| 18 | S | -0.459193 | 7.082454  | -1.906465 |
| 19 | C | 0.819859  | 6.426457  | -2.877847 |
| 20 | C | 0.978131  | 5.101303  | -2.602564 |
| 21 | H | 1.732246  | 4.485485  | -3.082592 |
| 22 | H | -1.592804 | 2.442193  | 2.390206  |
| 23 | C | -0.077399 | -3.200112 | -1.172138 |
| 24 | C | -0.130887 | -3.404769 | 1.369730  |
| 25 | C | -1.068801 | -4.362392 | 1.679151  |
| 26 | C | 0.781800  | -3.161344 | 2.449953  |
| 27 | S | -0.804831 | -4.969042 | 3.280953  |
| 28 | C | 0.556700  | -3.929758 | 3.553495  |
| 29 | H | 1.592804  | -2.442193 | 2.390206  |
| 30 | C | -0.078442 | -4.597426 | -1.603643 |
| 31 | C | 0.784258  | -5.565448 | -1.137394 |
| 32 | C | -0.978131 | -5.101303 | -2.602564 |
| 33 | S | 0.459193  | -7.082454 | -1.906465 |
| 34 | C | -0.819859 | -6.426457 | -2.877847 |
| 35 | H | -1.732246 | -4.485485 | -3.082592 |
| 36 | C | 1.583258  | 7.274551  | -3.839809 |
| 37 | H | 0.932188  | 7.709315  | -4.606030 |
| 38 | H | 2.098356  | 8.100908  | -3.338020 |
| 39 | H | 2.337780  | 6.667262  | -4.346386 |
| 40 | C | -1.889875 | 5.443514  | -0.144396 |
| 41 | H | -2.237159 | 4.407775  | -0.104992 |
| 42 | H | -1.562637 | 5.715871  | 0.865585  |
| 43 | H | -2.737370 | 6.081837  | -0.411292 |
| 44 | C | 2.204211  | 4.872738  | 0.857111  |
| 45 | H | 2.470647  | 4.133849  | 0.097098  |
| 46 | H | 1.943824  | 5.799940  | 0.333681  |
| 47 | H | 3.087368  | 5.067206  | 1.473071  |
| 48 | C | -1.310012 | 3.950113  | 4.841786  |
| 49 | H | -2.119988 | 3.217102  | 4.804963  |
| 50 | H | -0.668544 | 3.698902  | 5.693498  |
| 51 | H | -1.753327 | 4.931700  | 5.041989  |
| 52 | C | 1.310012  | -3.950113 | 4.841786  |
| 53 | H | 2.119988  | -3.217102 | 4.804963  |
| 54 | H | 0.668544  | -3.698902 | 5.693498  |
| 55 | H | 1.753327  | -4.931700 | 5.041989  |
| 56 | C | -2.204211 | -4.872738 | 0.857111  |
| 57 | H | -2.470647 | -4.133849 | 0.097098  |
| 58 | H | -1.943824 | -5.799940 | 0.333681  |
| 59 | H | -3.087368 | -5.067206 | 1.473071  |
| 60 | C | 1.889875  | -5.443514 | -0.144396 |
| 61 | H | 2.237159  | -4.407775 | -0.104992 |
| 62 | H | 1.562637  | -5.715871 | 0.865585  |
| 63 | H | 2.737370  | -6.081837 | -0.411292 |
| 64 | C | -1.583258 | -7.274551 | -3.839809 |
| 65 | H | -0.932188 | -7.709315 | -4.606030 |
| 66 | H | -2.098356 | -8.100908 | -3.338020 |
| 67 | H | -2.337780 | -6.667262 | -4.346386 |

PBE1PBE optimized geometries of the closed forms 1'-3'

| 1' (-2916.900435) |   |           |           | 2' (-3546.928861) |    |   |           |           |           |
|-------------------|---|-----------|-----------|-------------------|----|---|-----------|-----------|-----------|
| 1                 | C | 3.096886  | -0.524510 | -0.076802         | 1  | C | 2.246629  | -0.861607 | -0.107537 |
| 2                 | C | 2.404436  | -1.706333 | -0.231086         | 2  | C | 1.868631  | 0.468323  | 0.005692  |
| 3                 | C | 1.005895  | -1.509882 | -0.194479         | 3  | C | 0.449103  | 0.587174  | -0.010755 |
| 4                 | C | 0.620367  | -0.196719 | -0.023771         | 4  | C | -0.236918 | -0.602400 | -0.101131 |
| 5                 | C | -1.484718 | -1.264170 | -0.150644         | 5  | C | -2.028125 | 0.932019  | 0.039086  |
| 6                 | C | -0.798670 | 0.027937  | -0.051328         | 6  | C | -1.667513 | -0.487552 | -0.015810 |
| 7                 | H | 2.890518  | -2.658192 | -0.403546         | 7  | S | -0.604563 | 1.982754  | 0.165124  |
| 8                 | S | -0.350877 | -2.609831 | -0.377286         | 8  | S | 0.862177  | -1.925979 | -0.196719 |
| 9                 | S | 2.001911  | 0.827162  | 0.111533          | 9  | C | 3.577532  | -1.459955 | -0.196427 |
| 10                | C | 4.534590  | -0.294236 | -0.049205         | 10 | C | 4.576500  | -1.036788 | -1.046347 |
| 11                | C | 5.458508  | -1.166751 | 0.488581          | 11 | C | 3.972321  | -2.594626 | 0.589748  |
| 12                | C | 5.148576  | 0.892404  | -0.573553         | 12 | S | 5.990770  | -2.015665 | -0.847352 |
| 13                | S | 7.058410  | -0.528097 | 0.326883          | 13 | C | 5.247866  | -3.015396 | 0.360262  |
| 14                | C | 6.504564  | 0.920489  | -0.449756         | 14 | H | 3.319306  | -3.063094 | 1.319439  |
| 15                | H | 4.586812  | 1.688078  | -1.052625         | 15 | C | 5.986019  | -4.141829 | 1.003456  |
| 16                | C | 7.457260  | 1.977808  | -0.898613         | 16 | H | 6.307668  | -4.890004 | 0.270809  |
| 17                | H | 8.038100  | 2.384543  | -0.063717         | 17 | H | 6.879510  | -3.795702 | 1.534333  |
| 18                | H | 8.167796  | 1.598842  | -1.641113         | 18 | H | 5.337201  | -4.639887 | 1.728521  |
| 19                | H | 6.903100  | 2.801988  | -1.354926         | 19 | C | 4.555617  | 0.063659  | -2.052295 |
| 20                | C | 5.238674  | -2.477062 | 1.168327          | 20 | H | 5.135942  | -0.198855 | -2.941810 |
| 21                | H | 5.989702  | -2.654814 | 1.943392          | 21 | H | 3.525755  | 0.263553  | -2.359273 |
| 22                | H | 4.251413  | -2.493548 | 1.639382          | 22 | H | 4.960520  | 0.996716  | -1.643984 |
| 23                | H | 5.287689  | -3.318940 | 0.466667          | 23 | C | -3.316135 | 1.346909  | -0.053186 |
| 24                | C | -2.830227 | -1.372768 | -0.022912         | 24 | C | -4.380826 | 0.297742  | -0.382638 |
| 25                | C | -3.609165 | -0.123413 | 0.395446          | 25 | C | -3.873978 | 2.663445  | 0.033760  |
| 26                | C | -3.683063 | -2.517695 | -0.141913         | 26 | S | -5.978102 | 1.103768  | 0.102453  |
| 27                | S | -5.364653 | -0.510301 | -0.057253         | 27 | C | -5.225447 | 2.697173  | 0.117835  |
| 28                | C | -5.006734 | -2.231989 | -0.171273         | 28 | H | -3.267439 | 3.563589  | 0.066442  |
| 29                | H | -3.305542 | -3.531452 | -0.236729         | 29 | C | -2.647119 | -1.439123 | 0.057247  |
| 30                | C | -1.531079 | 1.183180  | -0.041208         | 30 | C | -4.068813 | -0.987519 | 0.393796  |
| 31                | C | -3.028618 | 1.092633  | -0.336862         | 31 | C | -2.552849 | -2.860400 | -0.053295 |
| 32                | C | -1.103295 | 2.535732  | 0.126874          | 32 | S | -5.135364 | -2.426615 | -0.080410 |
| 33                | S | -3.713319 | 2.713549  | 0.243803          | 33 | C | -3.745664 | -3.503572 | -0.129659 |
| 34                | C | -2.109273 | 3.433869  | 0.281325          | 34 | H | -1.610333 | -3.396246 | -0.108786 |
| 35                | H | -0.060246 | 2.834283  | 0.165298          | 35 | C | -3.970966 | -4.969224 | -0.261304 |
| 36                | C | -1.980780 | 4.902848  | 0.485676          | 36 | H | -4.529075 | -5.361809 | 0.596519  |
| 37                | H | -2.456696 | 5.458507  | -0.330548         | 37 | H | -4.556527 | -5.200683 | -1.158650 |
| 38                | H | -2.468639 | 5.217339  | 1.415613          | 38 | H | -3.017610 | -5.499210 | -0.326396 |
| 39                | H | -0.928259 | 5.192402  | 0.534373          | 39 | C | -4.162703 | -0.824282 | 1.921830  |
| 40                | C | -3.205383 | 1.035418  | -1.865194         | 40 | H | -5.180094 | -0.579592 | 2.232970  |
| 41                | H | -4.260910 | 1.051076  | -2.143410         | 41 | H | -3.862677 | -1.761606 | 2.396247  |
| 42                | H | -2.708358 | 1.900265  | -2.310887         | 42 | H | -3.490519 | -0.029287 | 2.257352  |
| 43                | H | -2.749468 | 0.124172  | -2.262935         | 43 | C | -4.399148 | 0.107430  | -1.909162 |
| 44                | C | -3.536134 | -0.013557 | 1.928199          | 44 | H | -4.551084 | 1.079207  | -2.384838 |
| 45                | H | -3.896045 | -0.946978 | 2.367374          | 45 | H | -3.443594 | -0.303900 | -2.247900 |
| 46                | H | -2.501119 | 0.147070  | 2.244344          | 46 | H | -5.201136 | -0.566214 | -2.216668 |
| 47                | H | -4.149039 | 0.810693  | 2.297625          | 47 | C | -6.092545 | 3.901992  | 0.232968  |
| 48                | C | -6.134758 | -3.195031 | -0.300962         | 48 | H | -6.774417 | 3.980894  | -0.621481 |
| 49                | H | -6.789766 | -3.156342 | 0.576920          | 49 | H | -6.712283 | 3.858257  | 1.136058  |
| 50                | H | -6.754212 | -2.962914 | -1.174997         | 50 | H | -5.484575 | 4.808913  | 0.276577  |
| 51                | H | -5.757530 | -4.215000 | -0.407644         | 51 | C | 2.767544  | 1.623108  | 0.155405  |
|                   |   |           |           |                   | 52 | C | 3.778098  | 1.725232  | 1.083243  |
|                   |   |           |           |                   | 53 | C | 2.644403  | 2.801669  | -0.653732 |
|                   |   |           |           |                   | 54 | S | 4.579536  | 3.254651  | 0.935802  |
|                   |   |           |           |                   | 55 | C | 3.553320  | 3.775119  | -0.362000 |
|                   |   |           |           |                   | 56 | H | 1.902931  | 2.905575  | -1.439716 |
|                   |   |           |           |                   | 57 | C | 3.721191  | 5.112696  | -1.002567 |
|                   |   |           |           |                   | 58 | H | 3.591443  | 5.928640  | -0.283235 |
|                   |   |           |           |                   | 59 | H | 4.711432  | 5.228647  | -1.456555 |
|                   |   |           |           |                   | 60 | H | 2.973975  | 5.238690  | -1.790317 |
|                   |   |           |           |                   | 61 | C | 4.203882  | 0.748448  | 2.127332  |
|                   |   |           |           |                   | 62 | H | 5.052315  | 0.139501  | 1.794386  |
|                   |   |           |           |                   | 63 | H | 4.492214  | 1.254582  | 3.053540  |
|                   |   |           |           |                   | 64 | H | 3.380440  | 0.065512  | 2.351121  |

| 3' (-4021.093891) |   |           |           |           |
|-------------------|---|-----------|-----------|-----------|
| -----             |   |           |           |           |
| 1                 | C | 1.335609  | 0.085020  | -0.056749 |
| 2                 | C | 0.823561  | -1.203097 | -0.155944 |
| 3                 | C | -0.588063 | -1.229822 | -0.127855 |
| 4                 | C | -1.136726 | 0.031317  | -0.011559 |
| 5                 | C | -3.081676 | -1.313127 | -0.080575 |
| 6                 | C | -2.573157 | 0.061567  | -0.043946 |
| 7                 | S | -1.779710 | -2.507290 | -0.252959 |
| 8                 | S | 0.075569  | 1.277328  | 0.078486  |
| 9                 | C | 2.759199  | 0.161909  | -0.015554 |
| 10                | C | -4.399841 | -1.596161 | 0.061243  |
| 11                | C | -5.338795 | -0.444552 | 0.427299  |
| 12                | C | -5.091118 | -2.849400 | 0.000133  |
| 13                | S | -7.026657 | -1.083394 | 0.004107  |
| 14                | C | -6.441188 | -2.744779 | -0.033941 |
| 15                | H | -4.581441 | -3.806926 | -0.050818 |
| 16                | C | -3.454501 | 1.107910  | -0.080463 |
| 17                | C | -4.926279 | 0.803093  | -0.363315 |
| 18                | C | -3.213940 | 2.511946  | 0.025304  |
| 19                | S | -5.824283 | 2.341341  | 0.146268  |
| 20                | C | -4.332349 | 3.272066  | 0.144529  |
| 21                | H | -2.221449 | 2.951249  | 0.045183  |
| 22                | C | -4.403246 | 4.752570  | 0.283032  |
| 23                | H | -4.949061 | 5.202135  | -0.554494 |
| 24                | H | -4.929860 | 5.039432  | 1.200670  |
| 25                | H | -3.399416 | 5.183105  | 0.313618  |
| 26                | C | -5.092474 | 0.651967  | -1.886478 |
| 27                | H | -6.140112 | 0.511000  | -2.159245 |
| 28                | H | -4.717676 | 1.554998  | -2.374001 |
| 29                | H | -4.516250 | -0.205920 | -2.244889 |
| 30                | C | -5.280305 | -0.255887 | 1.953041  |
| 31                | H | -5.511972 | -1.207817 | 2.436583  |
| 32                | H | -4.275975 | 0.055947  | 2.254796  |
| 33                | H | -5.997748 | 0.495194  | 2.288594  |
| 34                | C | -7.429878 | -3.855170 | -0.112652 |
| 35                | H | -8.083750 | -3.864293 | 0.766849  |
| 36                | H | -8.075125 | -3.748121 | -0.992233 |
| 37                | H | -6.919377 | -4.819222 | -0.175519 |
| 38                | S | 2.098184  | -2.362087 | -0.234700 |
| 39                | C | 3.315239  | -1.101840 | -0.120515 |
| 40                | C | 4.718323  | -1.509110 | -0.178799 |
| 41                | C | 5.664639  | -0.955861 | -1.014008 |
| 42                | C | 5.251492  | -2.573157 | 0.624169  |
| 43                | S | 7.197289  | -1.726453 | -0.780326 |
| 44                | C | 6.577539  | -2.812906 | 0.421934  |
| 45                | H | 4.655715  | -3.125062 | 1.344418  |
| 46                | C | 3.485263  | 1.430949  | 0.143898  |
| 47                | C | 4.452062  | 1.677768  | 1.090796  |
| 48                | C | 3.212928  | 2.577534  | -0.674689 |
| 49                | S | 5.031567  | 3.304809  | 0.949858  |
| 50                | C | 3.968920  | 3.670901  | -0.370945 |
| 51                | H | 2.484320  | 2.571705  | -1.479470 |
| 52                | C | 3.961517  | 5.015784  | -1.018169 |
| 53                | H | 4.934230  | 5.265099  | -1.456019 |
| 54                | H | 3.218570  | 5.033638  | -1.819729 |
| 55                | H | 3.707843  | 5.809553  | -0.307120 |
| 56                | C | 4.990869  | 0.773570  | 2.147857  |
| 57                | H | 5.186680  | 1.317427  | 3.076814  |
| 58                | H | 4.268407  | -0.018852 | 2.359066  |
| 59                | H | 5.923199  | 0.290458  | 1.833687  |
| 60                | C | 5.509841  | 0.124808  | -2.029684 |
| 61                | H | 6.136913  | -0.060310 | -2.906835 |
| 62                | H | 4.467955  | 0.177924  | -2.356050 |
| 63                | H | 5.774527  | 1.107517  | -1.622850 |
| 64                | C | 7.452578  | -3.822523 | 1.086997  |
| 65                | H | 7.887655  | -4.523110 | 0.366002  |
| 66                | H | 8.279859  | -3.353015 | 1.630238  |
| 67                | H | 6.865729  | -4.401500 | 1.804682  |

# HF optimized geometries of the open forms 1-3

| 1 (-2909.209905) |   |           |           | 2 (-3537.431785) |    |   |           |           |           |
|------------------|---|-----------|-----------|------------------|----|---|-----------|-----------|-----------|
| 1                | C | -6.390374 | 0.360983  | 0.940894         | 1  | S | 1.910796  | 0.799081  | -0.028475 |
| 2                | S | -6.900960 | -0.645529 | -0.380461        | 2  | S | -3.530584 | 4.303966  | 0.616619  |
| 3                | C | -5.267277 | -1.075028 | -0.787195        | 3  | S | 2.039290  | 5.913284  | -0.574420 |
| 4                | C | -4.394089 | -0.479962 | 0.057596         | 4  | C | 0.796585  | 2.155348  | -0.018840 |
| 5                | C | -5.052977 | 0.349986  | 1.043575         | 5  | C | -0.502571 | 1.763567  | -0.024424 |
| 6                | C | -5.004603 | -1.977275 | -1.958890        | 6  | C | -0.594845 | 0.325258  | -0.057340 |
| 7                | C | -2.928226 | -0.634495 | 0.010208         | 7  | C | -2.027003 | 3.508526  | 0.976274  |
| 8                | S | -1.897546 | 0.785285  | 0.039149         | 8  | C | -1.701595 | 2.637617  | -0.003069 |
| 9                | C | -0.477004 | -0.207033 | -0.029023        | 9  | C | -2.692503 | 2.594589  | -1.058198 |
| 10               | C | -0.805175 | -1.523771 | -0.070685        | 10 | H | -2.602015 | 1.953287  | -1.916099 |
| 11               | C | -2.213462 | -1.778459 | -0.043701        | 11 | C | -3.725765 | 3.430611  | -0.872786 |
| 12               | S | 0.613541  | -2.511793 | -0.107133        | 12 | C | 1.171361  | 4.458647  | -0.959996 |
| 13               | C | 1.646650  | -1.091890 | -0.058922        | 13 | C | 1.368870  | 3.519321  | -0.008569 |
| 14               | C | 0.938868  | 0.064740  | -0.010928        | 14 | C | 2.255187  | 3.972416  | 1.043074  |
| 15               | C | 3.110797  | -1.300995 | -0.076776        | 15 | H | 2.528702  | 3.354404  | 1.878705  |
| 16               | C | 3.954373  | -0.846127 | -1.029610        | 16 | C | 2.692503  | 5.230877  | 0.884225  |
| 17               | S | 5.587210  | -1.327007 | -0.682564        | 17 | S | -1.910796 | -0.799081 | -0.028475 |
| 18               | C | 5.115349  | -2.171373 | 0.761243         | 18 | S | 3.530584  | -4.303966 | 0.616619  |
| 19               | C | 3.789846  | -2.071710 | 0.943821         | 19 | S | -2.039290 | -5.913284 | -0.574420 |
| 20               | C | 1.484508  | 1.443560  | 0.049485         | 20 | C | -0.796585 | -2.155348 | -0.018840 |
| 21               | C | 2.254613  | 1.945445  | 1.038546         | 21 | C | 0.502571  | -1.763567 | -0.024424 |
| 22               | S | 2.644559  | 3.611138  | 0.728332         | 22 | C | 0.594845  | -0.325258 | -0.057340 |
| 23               | C | 1.737176  | 3.628260  | -0.753475        | 23 | C | 2.027003  | -3.508526 | 0.976274  |
| 24               | C | 1.185144  | 2.424825  | -0.972501        | 24 | C | 1.701595  | -2.637617 | -0.003069 |
| 25               | C | 2.761435  | 1.278807  | 2.284229         | 25 | C | 2.692503  | -2.594589 | -1.058198 |
| 26               | C | 1.643619  | 4.863546  | -1.599668        | 26 | H | 2.602015  | -1.953287 | -1.916099 |
| 27               | C | 3.655656  | -0.045065 | -2.262900        | 27 | C | 3.725765  | -3.430611 | -0.872786 |
| 28               | C | 6.122989  | -2.879717 | 1.617782         | 28 | C | -1.171361 | -4.458647 | -0.959996 |
| 29               | H | -2.658860 | -2.754381 | -0.039639        | 29 | C | -1.368870 | -3.519321 | -0.008569 |
| 30               | C | -7.383338 | 1.091828  | 1.795481         | 30 | C | -2.255187 | -3.972416 | 1.043074  |
| 31               | H | 2.665996  | 1.936847  | 3.141409         | 31 | H | -2.528702 | -3.354404 | 1.878705  |
| 32               | H | 3.806608  | 1.003791  | 2.185636         | 32 | C | -2.692503 | -5.230877 | 0.884225  |
| 33               | H | 2.195273  | 0.378536  | 2.482590         | 33 | C | 3.606692  | 6.018691  | 1.775498  |
| 34               | H | 0.579705  | 2.203513  | -1.832677        | 34 | H | 4.505353  | 6.325537  | 1.249503  |
| 35               | H | 1.194846  | 5.686040  | -1.051499        | 35 | H | 3.120912  | 6.913793  | 2.151429  |
| 36               | H | 1.031279  | 4.665970  | -2.471567        | 36 | H | 3.902956  | 5.413746  | 2.624294  |
| 37               | H | 2.622386  | 5.187280  | -1.939967        | 37 | C | 0.359130  | 4.383440  | -2.219618 |
| 38               | H | 4.226885  | -0.411189 | -3.109240        | 38 | H | 0.168433  | 3.350646  | -2.479260 |
| 39               | H | 3.899251  | 1.002559  | -2.119351        | 39 | H | -0.597254 | 4.882074  | -2.100762 |
| 40               | H | 2.603888  | -0.114274 | -2.506742        | 40 | H | 0.883260  | 4.851840  | -3.045802 |
| 41               | H | 3.274400  | -2.515212 | 1.776090         | 41 | C | -1.296673 | 3.831265  | 2.247301  |
| 42               | H | 6.638844  | -3.656794 | 1.062394         | 42 | H | -0.576221 | 3.055866  | 2.471050  |
| 43               | H | 5.626452  | -3.342308 | 2.462579         | 43 | H | -0.762872 | 4.772640  | 2.166055  |
| 44               | H | 6.871913  | -2.193253 | 2.000371         | 44 | H | -1.986360 | 3.906353  | 3.081329  |
| 45               | H | -5.186811 | -3.018061 | -1.706370        | 45 | C | -4.916605 | 3.649911  | -1.758532 |
| 46               | H | -5.649725 | -1.724288 | -2.793326        | 46 | H | -5.842807 | 3.421159  | -1.240650 |
| 47               | H | -3.976649 | -1.883490 | -2.283044        | 47 | H | -4.973645 | 4.678739  | -2.100391 |
| 48               | H | -4.515595 | 0.894020  | 1.798413         | 48 | H | -4.850016 | 3.007989  | -2.628993 |
| 49               | H | -8.060173 | 0.404364  | 2.293095         | 49 | C | -3.606692 | -6.018691 | 1.775498  |
| 50               | H | -6.863350 | 1.662885  | 2.555419         | 50 | H | -4.505353 | -6.325537 | 1.249503  |
| 51               | H | -7.982420 | 1.779459  | 1.206721         | 51 | H | -3.120912 | -6.913793 | 2.151429  |
|                  |   |           |           |                  | 52 | H | -3.902956 | -5.413746 | 2.624294  |
|                  |   |           |           |                  | 53 | C | -0.359130 | -4.383440 | -2.219618 |
|                  |   |           |           |                  | 54 | H | -0.168433 | -3.350646 | -2.479260 |
|                  |   |           |           |                  | 55 | H | 0.597254  | -4.882074 | -2.100762 |
|                  |   |           |           |                  | 56 | H | -0.883260 | -4.851840 | -3.045802 |
|                  |   |           |           |                  | 57 | C | 1.296673  | -3.831265 | 2.247301  |
|                  |   |           |           |                  | 58 | H | 0.576221  | -3.055866 | 2.471050  |
|                  |   |           |           |                  | 59 | H | 0.762872  | -4.772640 | 2.166055  |
|                  |   |           |           |                  | 60 | H | 1.986360  | -3.906353 | 3.081329  |
|                  |   |           |           |                  | 61 | C | 4.916605  | -3.649911 | -1.758532 |
|                  |   |           |           |                  | 62 | H | 5.842807  | -3.421159 | -1.240650 |
|                  |   |           |           |                  | 63 | H | 4.973645  | -4.678739 | -2.100391 |
|                  |   |           |           |                  | 64 | H | 4.850016  | -3.007989 | -2.628993 |



3 (-4010.673864)

|    |   |           |           |           |
|----|---|-----------|-----------|-----------|
| 1  | C | -0.890025 | 4.013170  | 3.452009  |
| 2  | C | -1.065602 | 3.283894  | 2.339159  |
| 3  | C | 0.000511  | 3.422772  | 1.369176  |
| 4  | C | 0.977327  | 4.255094  | 1.789102  |
| 5  | S | 0.602459  | 4.898214  | 3.359991  |
| 6  | C | -0.007757 | 2.672896  | 0.088251  |
| 7  | C | -0.021988 | 1.232572  | 0.036200  |
| 8  | C | -0.012264 | 0.714238  | -1.221051 |
| 9  | S | -0.004882 | 1.963551  | -2.411821 |
| 10 | C | -0.007077 | 3.198241  | -1.162995 |
| 11 | S | 0.000000  | 0.000000  | 1.274144  |
| 12 | C | 0.021988  | -1.232572 | 0.036200  |
| 13 | C | 0.012264  | -0.714238 | -1.221051 |
| 14 | C | 0.007757  | -2.672896 | 0.088251  |
| 15 | S | 0.004882  | -1.963551 | -2.411821 |
| 16 | C | -0.009001 | 4.613553  | -1.592371 |
| 17 | C | -0.977327 | 5.513946  | -1.312628 |
| 18 | S | -0.602458 | 7.055449  | -2.019711 |
| 19 | C | 0.874751  | 6.464663  | -2.718852 |
| 20 | C | 1.047316  | 5.169996  | -2.411582 |
| 21 | H | 1.896005  | 4.595372  | -2.735010 |
| 22 | H | -1.923128 | 2.656570  | 2.176462  |
| 23 | C | 0.007077  | -3.198241 | -1.162995 |
| 24 | C | -0.000511 | -3.422772 | 1.369176  |
| 25 | C | -0.977327 | -4.255094 | 1.789102  |
| 26 | C | 1.065602  | -3.283894 | 2.339159  |
| 27 | S | -0.602459 | -4.898214 | 3.359991  |
| 28 | C | 0.890025  | -4.013170 | 3.452009  |
| 29 | H | 1.923128  | -2.656570 | 2.176462  |
| 30 | C | 0.009001  | -4.613553 | -1.592371 |
| 31 | C | 0.977327  | -5.513946 | -1.312628 |
| 32 | C | -1.047316 | -5.169996 | -2.411582 |
| 33 | S | 0.602458  | -7.055449 | -2.019711 |
| 34 | C | -0.874751 | -6.464663 | -2.718852 |
| 35 | H | -1.896005 | -4.595372 | -2.735010 |
| 36 | C | 1.765440  | 7.355343  | -3.533816 |
| 37 | H | 1.246453  | 7.745740  | -4.403648 |
| 38 | H | 2.120743  | 8.200735  | -2.952846 |
| 39 | H | 2.627508  | 6.796504  | -3.878362 |
| 40 | C | -2.245678 | 5.336991  | -0.530316 |
| 41 | H | -2.491163 | 4.286366  | -0.450200 |
| 42 | H | -2.146702 | 5.736784  | 0.473566  |
| 43 | H | -3.072655 | 5.844306  | -1.015373 |
| 44 | C | 2.255543  | 4.646621  | 1.106464  |
| 45 | H | 2.483726  | 3.948746  | 0.311911  |
| 46 | H | 2.181200  | 5.638303  | 0.671995  |
| 47 | H | 3.083795  | 4.647365  | 1.807046  |
| 48 | C | -1.788049 | 4.115452  | 4.649450  |
| 49 | H | -2.658499 | 3.485247  | 4.510527  |
| 50 | H | -1.280224 | 3.794850  | 5.553701  |
| 51 | H | -2.129155 | 5.134355  | 4.804529  |
| 52 | C | 1.788049  | -4.115452 | 4.649450  |
| 53 | H | 2.658499  | -3.485247 | 4.510527  |
| 54 | H | 1.280224  | -3.794850 | 5.553701  |
| 55 | H | 2.129155  | -5.134355 | 4.804529  |
| 56 | C | -2.255543 | -4.646621 | 1.106464  |
| 57 | H | -2.483726 | -3.948746 | 0.311911  |
| 58 | H | -2.181200 | -5.638303 | 0.671995  |
| 59 | H | -3.083795 | -4.647365 | 1.807046  |
| 60 | C | 2.245678  | -5.336991 | -0.530316 |
| 61 | H | 2.491163  | -4.286366 | -0.450200 |
| 62 | H | 2.146702  | -5.736784 | 0.473566  |
| 63 | H | 3.072655  | -5.844306 | -1.015373 |
| 64 | C | -1.765440 | -7.355343 | -3.533816 |
| 65 | H | -1.246453 | -7.745740 | -4.403648 |
| 66 | H | -2.120743 | -8.200735 | -2.952846 |
| 67 | H | -2.627508 | -6.796504 | -3.878362 |

CIS S<sub>1</sub> optimized geometries of the open forms 1–3

| 1 (-2909.188529) |   |           |           | 2 (-3537.410318) |    |   |           |           |           |
|------------------|---|-----------|-----------|------------------|----|---|-----------|-----------|-----------|
| 1                | C | -6.319900 | 0.703486  | 0.351940         | 1  | S | 1.933612  | 0.825405  | -0.116902 |
| 2                | S | -6.879152 | -0.904701 | -0.012695        | 2  | S | -3.594980 | 4.153994  | 0.815592  |
| 3                | C | -5.277637 | -1.510234 | -0.221648        | 3  | S | 1.786270  | 6.008473  | -0.490078 |
| 4                | C | -4.335573 | -0.513461 | -0.006421        | 4  | C | 0.773567  | 2.175007  | -0.130000 |
| 5                | C | -4.984529 | 0.751557  | 0.312486         | 5  | C | -0.566467 | 1.714957  | -0.131401 |
| 6                | C | -5.095686 | -2.942715 | -0.626042        | 6  | C | -0.623279 | 0.333408  | -0.182079 |
| 7                | C | -2.921000 | -0.641751 | -0.070930        | 7  | C | -2.035119 | 3.413395  | 1.018399  |
| 8                | S | -1.887111 | 0.813861  | -0.019167        | 8  | C | -1.780978 | 2.552162  | 0.007469  |
| 9                | C | -0.446273 | -0.175873 | -0.121101        | 9  | C | -2.874749 | 2.470726  | -0.938357 |
| 10               | C | -0.788841 | -1.549531 | -0.177477        | 10 | H | -2.847892 | 1.833802  | -1.803655 |
| 11               | C | -2.133246 | -1.813106 | -0.151115        | 11 | C | -3.912194 | 3.269826  | -0.646622 |
| 12               | S | 0.654097  | -2.533561 | -0.214501        | 12 | C | 0.827151  | 4.604238  | -0.817110 |
| 13               | C | 1.678598  | -1.080813 | -0.160369        | 13 | C | 1.305979  | 3.511909  | -0.131482 |
| 14               | C | 0.912580  | 0.099037  | -0.092317        | 14 | C | 2.506888  | 3.844885  | 0.624727  |
| 15               | C | 3.111560  | -1.275127 | -0.184492        | 15 | H | 3.027949  | 3.125531  | 1.229166  |
| 16               | C | 4.036953  | -0.546947 | -0.884762        | 16 | C | 2.874749  | 5.128256  | 0.547747  |
| 17               | S | 5.638829  | -1.141447 | -0.595120        | 17 | S | -1.933612 | -0.825405 | -0.116902 |
| 18               | C | 5.069577  | -2.410172 | 0.452326         | 18 | S | 3.594980  | -4.153994 | 0.815592  |
| 19               | C | 3.736618  | -2.360402 | 0.558956         | 19 | S | -1.786270 | -6.008473 | -0.490078 |
| 20               | C | 1.437055  | 1.476885  | 0.073302         | 20 | C | -0.773567 | -2.175007 | -0.130000 |
| 21               | C | 2.214822  | 1.906359  | 1.091225         | 21 | C | 0.566467  | -1.714957 | -0.131401 |
| 22               | S | 2.558970  | 3.602774  | 0.926403         | 22 | C | 0.623279  | -0.333408 | -0.182079 |
| 23               | C | 1.620062  | 3.731696  | -0.530272        | 23 | C | 2.035119  | -3.413395 | 1.018399  |
| 24               | C | 1.092836  | 2.539466  | -0.848127        | 24 | C | 1.780978  | -2.552162 | 0.007469  |
| 25               | C | 2.756041  | 1.147438  | 2.268339         | 25 | C | 2.874749  | -2.470726 | -0.938357 |
| 26               | C | 1.480925  | 5.035595  | -1.259044        | 26 | H | 2.847892  | -1.833802 | -1.803655 |
| 27               | C | 3.839963  | 0.554438  | -1.883024        | 27 | C | 3.912194  | -3.269826 | -0.646622 |
| 28               | C | 6.022464  | -3.362116 | 1.112100         | 28 | C | -0.827151 | -4.604238 | -0.817110 |
| 29               | H | -2.550853 | -2.797116 | -0.150452        | 29 | C | -1.305979 | -3.511909 | -0.131482 |
| 30               | C | -7.283114 | 1.809674  | 0.664045         | 30 | C | -2.506888 | -3.844885 | 0.624727  |
| 31               | H | 2.633231  | 1.717347  | 3.183259         | 31 | H | -3.027949 | -3.125531 | 1.229166  |
| 32               | H | 3.812726  | 0.931814  | 2.145580         | 32 | C | -2.874749 | -5.128256 | 0.547747  |
| 33               | H | 2.233142  | 0.207519  | 2.380775         | 33 | C | 4.020719  | 5.812404  | 1.231564  |
| 34               | H | 0.477379  | 2.380318  | -1.714783        | 34 | H | 4.700981  | 6.257817  | 0.512268  |
| 35               | H | 1.024673  | 5.793841  | -0.630302        | 35 | H | 3.673600  | 6.601200  | 1.891772  |
| 36               | H | 0.855672  | 4.902246  | -2.133940        | 36 | H | 4.576968  | 5.095544  | 1.823790  |
| 37               | H | 2.444811  | 5.412934  | -1.586377        | 37 | C | -0.266290 | 4.697535  | -1.838682 |
| 38               | H | 4.541957  | 0.449702  | -2.704079        | 38 | H | -0.464115 | 3.724142  | -2.266925 |
| 39               | H | 3.985812  | 1.534897  | -1.441569        | 39 | H | -1.192867 | 5.071054  | -1.414605 |
| 40               | H | 2.838074  | 0.516825  | -2.289267        | 40 | H | 0.025967  | 5.366712  | -2.641870 |
| 41               | H | 3.174931  | -3.040319 | 1.172648         | 41 | C | -1.201107 | 3.755619  | 2.219379  |
| 42               | H | 6.601122  | -3.914410 | 0.378181         | 42 | H | -0.415953 | 3.024048  | 2.351915  |
| 43               | H | 5.472133  | -4.075233 | 1.714352         | 43 | H | -0.737396 | 4.731180  | 2.112731  |
| 44               | H | 6.720199  | -2.839387 | 1.758993         | 44 | H | -1.809272 | 3.769205  | 3.117706  |
| 45               | H | -4.693752 | -3.546481 | 0.185258         | 45 | C | -5.193733 | 3.447054  | -1.406062 |
| 46               | H | -6.043816 | -3.381413 | -0.913965        | 46 | H | -6.053988 | 3.188629  | -0.796506 |
| 47               | H | -4.422955 | -3.027685 | -1.473884        | 47 | H | -5.319849 | 4.472607  | -1.739160 |
| 48               | H | -4.437586 | 1.652155  | 0.520755         | 48 | H | -5.194613 | 2.805621  | -2.279373 |
| 49               | H | -7.881420 | 1.577026  | 1.539376         | 49 | C | -4.020719 | -5.812404 | 1.231564  |
| 50               | H | -6.739541 | 2.726274  | 0.859597         | 50 | H | -4.700981 | -6.257817 | 0.512268  |
| 51               | H | -7.961620 | 1.988046  | -0.164331        | 51 | H | -3.673600 | -6.601200 | 1.891772  |
|                  |   |           |           |                  | 52 | H | -4.576968 | -5.095544 | 1.823790  |
|                  |   |           |           |                  | 53 | C | 0.266290  | -4.697535 | -1.838682 |
|                  |   |           |           |                  | 54 | H | 0.464115  | -3.724142 | -2.266925 |
|                  |   |           |           |                  | 55 | H | 1.192867  | -5.071054 | -1.414605 |
|                  |   |           |           |                  | 56 | H | -0.025967 | -5.366712 | -2.641870 |
|                  |   |           |           |                  | 57 | C | 1.201107  | -3.755619 | 2.219379  |
|                  |   |           |           |                  | 58 | H | 0.415953  | -3.024048 | 2.351915  |
|                  |   |           |           |                  | 59 | H | 0.737396  | -4.731180 | 2.112731  |
|                  |   |           |           |                  | 60 | H | 1.809272  | -3.769205 | 3.117706  |
|                  |   |           |           |                  | 61 | C | 5.193733  | -3.447054 | -1.406062 |
|                  |   |           |           |                  | 62 | H | 6.053988  | -3.188629 | -0.796506 |
|                  |   |           |           |                  | 63 | H | 5.319849  | -4.472607 | -1.739160 |
|                  |   |           |           |                  | 64 | H | 5.194613  | -2.805621 | -2.279373 |

3 (-4010.654623)

|    |   |           |           |           |
|----|---|-----------|-----------|-----------|
| 1  | C | 0.735464  | 3.941125  | 3.536730  |
| 2  | C | 0.255533  | 3.347909  | 2.432864  |
| 3  | C | 1.243723  | 3.147773  | 1.393810  |
| 4  | C | 2.469495  | 3.587658  | 1.752789  |
| 5  | S | 2.430798  | 4.273612  | 3.349789  |
| 6  | C | 0.909440  | 2.468892  | 0.116775  |
| 7  | C | 0.412257  | 1.172566  | 0.075673  |
| 8  | C | 0.228699  | 0.644917  | -1.226931 |
| 9  | S | 0.674622  | 1.818109  | -2.433370 |
| 10 | C | 1.100976  | 2.989064  | -1.173428 |
| 11 | S | 0.000000  | 0.000000  | 1.330724  |
| 12 | C | -0.412257 | -1.172566 | 0.075673  |
| 13 | C | -0.228699 | -0.644917 | -1.226931 |
| 14 | C | -0.909440 | -2.468892 | 0.116775  |
| 15 | S | -0.674622 | -1.818109 | -2.433370 |
| 16 | C | 1.589073  | 4.285973  | -1.606354 |
| 17 | C | 1.233942  | 5.507838  | -1.108549 |
| 18 | S | 2.075575  | 6.778704  | -1.934054 |
| 19 | C | 2.895961  | 5.664394  | -2.989049 |
| 20 | C | 2.533638  | 4.406813  | -2.706864 |
| 21 | H | 2.931966  | 3.553889  | -3.224907 |
| 22 | H | -0.772414 | 3.054234  | 2.322310  |
| 23 | C | -1.100976 | -2.989064 | -1.173428 |
| 24 | C | -1.243723 | -3.147773 | 1.393810  |
| 25 | C | -2.469495 | -3.587658 | 1.752789  |
| 26 | C | -0.255533 | -3.347909 | 2.432864  |
| 27 | S | -2.430798 | -4.273612 | 3.349789  |
| 28 | C | -0.735464 | -3.941125 | 3.536730  |
| 29 | H | 0.772414  | -3.054234 | 2.322310  |
| 30 | C | -1.589073 | -4.285973 | -1.606354 |
| 31 | C | -1.233942 | -5.507838 | -1.108549 |
| 32 | C | -2.533638 | -4.406813 | -2.706864 |
| 33 | S | -2.075575 | -6.778704 | -1.934054 |
| 34 | C | -2.895961 | -5.664394 | -2.989049 |
| 35 | H | -2.931966 | -3.553889 | -3.224907 |
| 36 | C | 3.868824  | 6.143666  | -4.025223 |
| 37 | H | 3.393965  | 6.817329  | -4.731715 |
| 38 | H | 4.702057  | 6.671888  | -3.572245 |
| 39 | H | 4.263801  | 5.299117  | -4.577293 |
| 40 | C | 0.209791  | 5.863464  | -0.072319 |
| 41 | H | -0.512522 | 5.064645  | 0.029605  |
| 42 | H | 0.660312  | 6.034346  | 0.899768  |
| 43 | H | -0.321168 | 6.765404  | -0.358845 |
| 44 | C | 3.763671  | 3.538337  | 0.993123  |
| 45 | H | 3.688386  | 2.842041  | 0.168958  |
| 46 | H | 4.019217  | 4.512321  | 0.588031  |
| 47 | H | 4.576269  | 3.218043  | 1.636521  |
| 48 | C | 0.000000  | 4.305748  | 4.792444  |
| 49 | H | -1.039121 | 4.010509  | 4.708061  |
| 50 | H | 0.423527  | 3.806415  | 5.658241  |
| 51 | H | 0.034246  | 5.375029  | 4.976932  |
| 52 | C | 0.000000  | -4.305748 | 4.792444  |
| 53 | H | 1.039121  | -4.010509 | 4.708061  |
| 54 | H | -0.423527 | -3.806415 | 5.658241  |
| 55 | H | -0.034246 | -5.375029 | 4.976932  |
| 56 | C | -3.763671 | -3.538337 | 0.993123  |
| 57 | H | -3.688386 | -2.842041 | 0.168958  |
| 58 | H | -4.019217 | -4.512321 | 0.588031  |
| 59 | H | -4.576269 | -3.218043 | 1.636521  |
| 60 | C | -0.209791 | -5.863464 | -0.072319 |
| 61 | H | 0.512522  | -5.064645 | 0.029605  |
| 62 | H | -0.660312 | -6.034346 | 0.899768  |
| 63 | H | 0.321168  | -6.765404 | -0.358845 |
| 64 | C | -3.868824 | -6.143666 | -4.025223 |
| 65 | H | -3.393965 | -6.817329 | -4.731715 |
| 66 | H | -4.702057 | -6.671888 | -3.572245 |
| 67 | H | -4.263801 | -5.299117 | -4.577293 |
